# Supplementary material
Source: PubMed Central journal article supplement (PMC4889438)

*Smarta LCMV specific iTreg : LCMV specific Teff ratio*

**Teff**

**CD4**

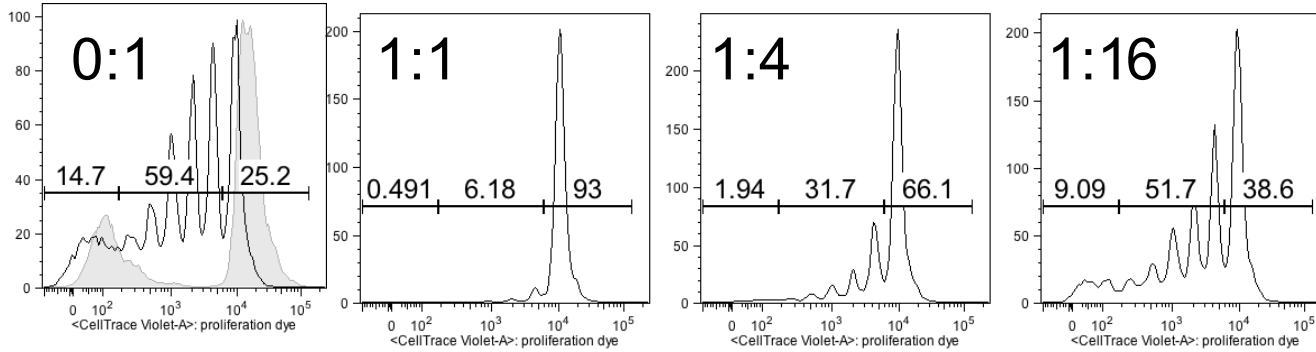

**CD8**

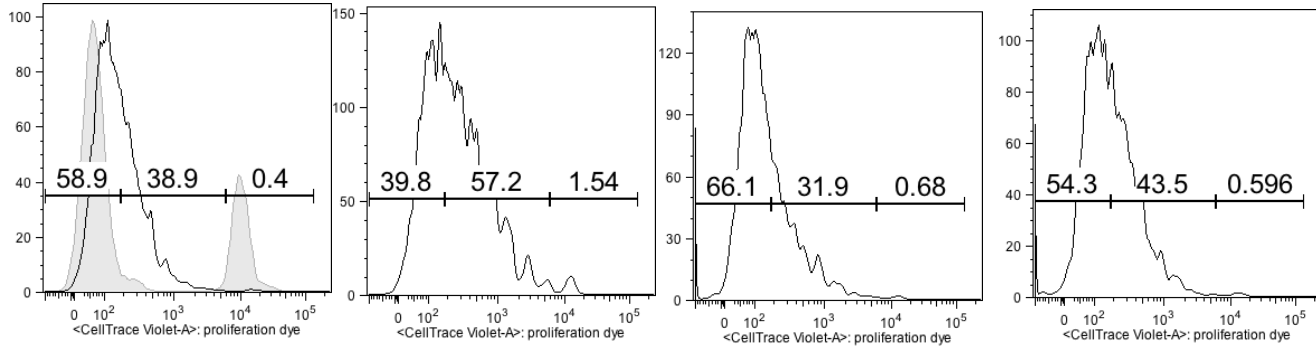

Supplement: NIHMS608976-supplement-01.pdf [file NIHMS608976-supplement-01.pdf]

**B**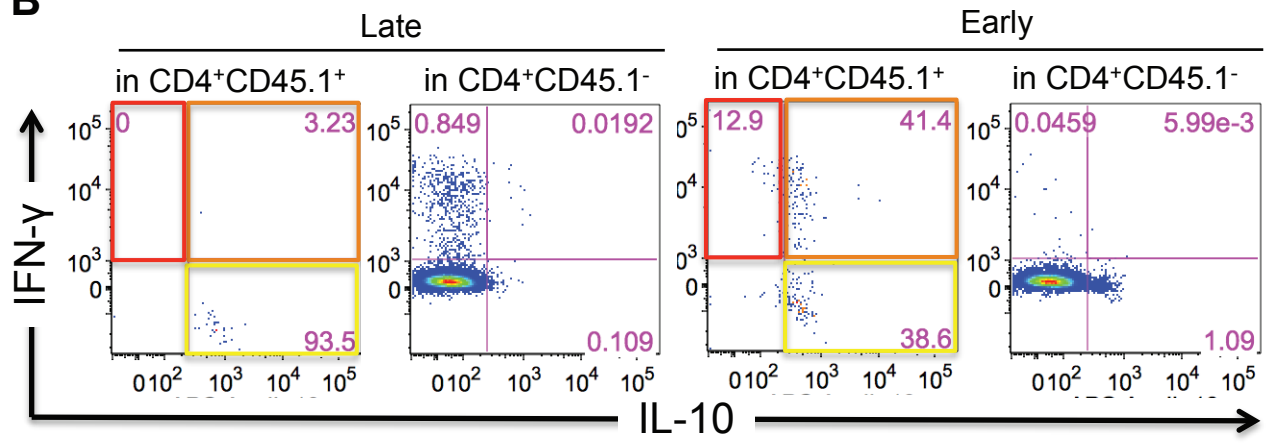

Supplement: NIHMS608976-supplement-02.pdf [file NIHMS608976-supplement-02.pdf]
